# Supplementary material for: Incidence, Disability, and Mortality in Patients With Guillain-Barré Syndrome in Korea: A Nationwide Population-Based Study
Source: PubMed Central journal article supplement — J Clin Neurol. 2021 Dec 30;18(1):48–58. doi: 10.3988/jcn.2022.18.1.48 (PMC8762496; doi:10.3988/jcn.2022.18.1.48), 2021-12-30
Supplement: jcn-18-48-s001.pdf [file jcn-18-48-s001.pdf]

**Supplementary Table 1.** Accuracy of various operational definitions of GBS in Gangnam Severance Hospital

| <b>Operational definition</b>                                   | <b>Sensitivity (%)</b> | <b>Specificity (%)</b> | <b>PPV (%)</b> | <b>NPV (%)</b> |
|-----------------------------------------------------------------|------------------------|------------------------|----------------|----------------|
| Diagnostic code for GBS only                                    | 100                    | 22                     | 35             | 100            |
| Diagnostic code for GBS + NCS                                   | 77                     | 61                     | 46             | 86             |
| Diagnostic code for GBS + hospitalization                       | 100                    | 86                     | 75             | 100            |
| Diagnostic code for GBS + specific department*                  | 100                    | 45                     | 44             | 100            |
| Diagnostic code for GBS + specific department + hospitalization | 100                    | 92                     | 85             | 100            |

\*Specific department: departments of neurology, rehabilitation medicine, or pediatrics.

GBS, Guillain-Barré syndrome; NCS, nerve conduction study; NPV, negative predictive value; PPV, positive predictive value.
