# Supplementary material for: Incidence, Disability, and Mortality in Patients With Guillain-Barré Syndrome in Korea: A Nationwide Population-Based Study
Source: PubMed Central journal article supplement — J Clin Neurol. 2021 Dec 30;18(1):48–58. doi: 10.3988/jcn.2022.18.1.48 (PMC8762496; doi:10.3988/jcn.2022.18.1.48), 2021-12-30
Supplement: jcn-18-48-s002.pdf [file jcn-18-48-s002.pdf]

**Supplementary Table 2.** Physical disability in patients with GBS who had no disability at the time of GBS diagnosis

| Characteristic         | Total patients | Median time from GBS diagnosis to diagnosis of disability (yr) <sup>†</sup> | Patients with disability |          |                     |                   |
|------------------------|----------------|-----------------------------------------------------------------------------|--------------------------|----------|---------------------|-------------------|
|                        |                |                                                                             | Total                    | <i>p</i> | Moderate disability | Severe disability |
| Age (yr)               |                |                                                                             |                          | <0.001   |                     |                   |
| <25                    | 2,051          | 0.7                                                                         | 101 (5)                  |          | 52 (3)              | 49 (3)            |
| 25–44                  | 2,368          | 0.6                                                                         | 196 (9)                  |          | 93 (4)              | 103 (5)           |
| 45–64                  | 3,481          | 0.6                                                                         | 449 (15)                 |          | 210 (7)             | 239 (8)           |
| ≥65                    | 2,214          | 0.6                                                                         | 282 (15)                 |          | 147 (8)             | 135 (7)           |
| Sex                    |                |                                                                             |                          | 0.866    |                     |                   |
| Male                   | 5,999          | 0.6                                                                         | 612 (11)                 |          | 287 (5)             | 325 (6)           |
| Female                 | 4,115          | 0.6                                                                         | 416 (11)                 |          | 215 (6)             | 201 (5)           |
| Income level*          |                | 0.6                                                                         |                          | 0.348    |                     |                   |
| Low                    | 2,955          | 0.6                                                                         | 317 (12)                 |          | 145 (6)             | 172 (7)           |
| Middle                 | 3,354          | 0.6                                                                         | 327 (11)                 |          | 160 (5)             | 167 (6)           |
| High                   | 3,805          | 0.6                                                                         | 384 (11)                 |          | 197 (6)             | 187 (6)           |
| Hospital type          |                |                                                                             |                          | 0.017    |                     |                   |
| Referral hospital      | 6,445          | 0.6                                                                         | 624 (11)                 |          | 296 (5)             | 328 (6)           |
| Nonreferral hospital   | 3,669          | 0.6                                                                         | 404 (12)                 |          | 206 (6)             | 198 (6)           |
| Hospitalization period |                |                                                                             |                          | <0.001   |                     |                   |
| <30 days               | 7,924          | 0.6                                                                         | 457 (6)                  |          | 257 (3)             | 200 (3)           |
| ≥30 days               | 2,190          | 0.6                                                                         | 571 (35)                 |          | 245 (15)            | 326 (20)          |
| IVIg                   |                |                                                                             |                          | <0.001   |                     |                   |
| Yes                    | 4,420          | 0.6                                                                         | 657 (17)                 |          | 304 (8)             | 353 (9)           |
| No                     | 5,694          | 0.6                                                                         | 371 (7)                  |          | 198 (4)             | 173 (3)           |
| Plasmapheresis         |                |                                                                             |                          | <0.001   |                     |                   |
| Yes                    | 165            | 0.6                                                                         | 57 (53)                  |          | 18 (17)             | 39 (36)           |
| No                     | 9,949          | 0.6                                                                         | 971 (11)                 |          | 484 (5)             | 487 (5)           |
| Tracheostomy           |                |                                                                             |                          | <0.001   |                     |                   |
| Yes                    | 497            | 0.6                                                                         | 215 (76)                 |          | 63 (22)             | 152 (54)          |
| No                     | 9,617          | 0.6                                                                         | 813 (9)                  |          | 439 (5)             | 374 (4)           |

Data are *n* (%) values except where indicated otherwise.

\*Income levels were classified into three categories: 1) low (poorest 30% of the population), 2) middle (31%–70% of the population), and 3) high (richest 30% of the population); <sup>†</sup>For 1,028 patients who had been diagnosed with disability up to December 31, 2019.

GBS, Guillain-Barré syndrome; IVIg, intravenous immunoglobulin.
