# Supplementary material for: Incidence, Disability, and Mortality in Patients With Guillain-Barré Syndrome in Korea: A Nationwide Population-Based Study
Source: PubMed Central journal article supplement — J Clin Neurol. 2021 Dec 30;18(1):48–58. doi: 10.3988/jcn.2022.18.1.48 (PMC8762496; doi:10.3988/jcn.2022.18.1.48), 2021-12-30
Supplement: jcn-18-48-s003.pdf [file jcn-18-48-s003.pdf]

**Supplementary Table 3.** Annual mortality rates among patients with Guillain-Barré syndrome

| Annual mortality rate | Observed deaths | Expected deaths | SMR (95% CI)     |
|-----------------------|-----------------|-----------------|------------------|
| 1-year mortality rate |                 |                 |                  |
| Total                 | 552             | 98.1            | 5.63 (5.17–6.12) |
| Male                  | 341             | 67.4            | 5.06 (4.54–5.63) |
| Female                | 211             | 30.7            | 6.87 (5.98–7.87) |
| 2-year mortality rate |                 |                 |                  |
| Total                 | 693             | 173.5           | 3.99 (3.70–4.30) |
| Male                  | 445             | 118.4           | 3.76 (3.42–4.13) |
| Female                | 248             | 55.2            | 4.50 (3.95–5.09) |
| 3-year mortality rate |                 |                 |                  |
| Total                 | 746             | 236.4           | 3.16 (2.93–3.39) |
| Male                  | 487             | 159.5           | 3.05 (2.79–3.34) |
| Female                | 259             | 76.8            | 3.37 (2.97–3.81) |
| 4-year mortality rate |                 |                 |                  |
| Total                 | 787             | 278.2           | 2.83 (2.63–3.03) |
| Male                  | 523             | 185.4           | 2.82 (2.58–3.07) |
| Female                | 264             | 92.8            | 3.85 (2.51–3.21) |
| 5-year mortality rate |                 |                 |                  |
| Total                 | 800             | 303.3           | 2.64 (2.46–2.83) |
| Male                  | 536             | 202.6           | 2.65 (2.43–2.88) |
| Female                | 264             | 100.7           | 2.62 (2.32–2.96) |

CI, confidence interval; SMR, standardized mortality ratio.
