# Supplementary material for: Incidence, Disability, and Mortality in Patients With Guillain-Barré Syndrome in Korea: A Nationwide Population-Based Study
Source: PubMed Central journal article supplement — J Clin Neurol. 2021 Dec 30;18(1):48–58. doi: 10.3988/jcn.2022.18.1.48 (PMC8762496; doi:10.3988/jcn.2022.18.1.48), 2021-12-30
Supplement: jcn-18-48-s004.pdf [file jcn-18-48-s004.pdf]

**Supplementary Table 4.** Causes of death among patients with Guillain-Barré syndrome in the Republic of Korea, 2005–2018

| Disease                                                                                     | Observed deaths |      |        | Expected deaths |       |        | SMR (95% CI)        |                     |                     |
|---------------------------------------------------------------------------------------------|-----------------|------|--------|-----------------|-------|--------|---------------------|---------------------|---------------------|
|                                                                                             | Total           | Male | Female | Total           | Male  | Female | Total               | Male                | Female              |
| Total                                                                                       | 1,403           | 927  | 476    | 710.5           | 458.8 | 251.8  | 1.97 (1.87–2.08)    | 2.02 (1.89–2.15)    | 1.89 (1.72–2.07)    |
| Certain infectious and parasitic diseases (A00–B99)                                         | 46              | 33   | 13     | 18.0            | 11.7  | 6.3    | 2.55 (1.87–3.41)    | 2.83 (1.95–3.97)    | 2.05 (1.09–3.50)    |
| Neoplasms (C00–D48)                                                                         | 302             | 225  | 77     | 210.9           | 151.5 | 59.3   | 1.43 (1.28–1.60)    | 1.48 (1.30–1.69)    | 1.30 (1.02–1.62)    |
| Malignant neoplasm of stomach (C16)                                                         | 37              | 25   | 12     | 28.7            | 21.3  | 7.4    | 1.29 (0.91–1.78)    | 1.17 (0.76–1.73)    | 1.62 (0.84–2.83)    |
| Malignant neoplasms of colon, rectosigmoid junction, rectum, anus, and anal canal (C18–C21) | 11              | 7    | 4      | 21.2            | 13.9  | 7.3    | 0.52 (0.26–0.93)    | 0.50 (0.20–1.03)    | 0.55 (0.15–1.41)    |
| Malignant neoplasms of liver and intrahepatic bile ducts (C22)                              | 46              | 36   | 10     | 31.0            | 24.6  | 6.4    | 1.48 (1.09–1.98)    | 1.46 (1.02–2.02)    | 1.56 (0.75–2.87)    |
| Malignant neoplasms of trachea, bronchus, and lung (C33 & C34)                              | 80              | 69   | 11     | 50.7            | 41.0  | 9.6    | 1.58 (1.25–1.96)    | 1.68 (1.31–2.13)    | 1.14 (0.57–2.04)    |
| Endocrine, nutritional, and metabolic diseases (E00–E90)                                    | 59              | 30   | 29     | 33.9            | 19.8  | 14.1   | 1.74 (1.33–2.25)    | 1.52 (1.02–2.17)    | 2.05 (1.37–2.95)    |
| Mental and behavioral disorders (F00–F99)                                                   | 13              | 7    | 6      | 12.9            | 6.7   | 6.1    | 1.01 (0.54–1.73)    | 1.04 (0.42–2.14)    | 0.98 (0.36–2.14)    |
| Diseases of the nervous system (G00–G99)                                                    | 381             | 226  | 155    | 19.3            | 10.4  | 8.9    | 19.75 (17.81–21.83) | 21.77 (19.02–24.80) | 17.39 (14.76–20.35) |
| Diseases of the circulatory system (I00–I99)                                                | 198             | 121  | 77     | 165.4           | 94.9  | 70.5   | 1.20 (1.04–1.38)    | 1.27 (1.06–1.52)    | 1.09 (0.86–1.37)    |
| Diseases of the respiratory system (J00–J99)                                                | 111             | 74   | 37     | 64.3            | 44.3  | 20.0   | 1.73 (1.42–2.08)    | 1.67 (1.31–2.10)    | 1.85 (1.30–2.55)    |
| Diseases of the digestive system (K00–K93)                                                  | 67              | 48   | 19     | 29.7            | 21.6  | 8.1    | 2.26 (1.75–2.86)    | 2.22 (1.64–2.94)    | 2.36 (1.42–3.68)    |
| Diseases of the musculoskeletal system and connective tissue (M00–M99)                      | 13              | 9    | 4      | 4.5             | 1.8   | 2.7    | 2.90 (1.54–4.96)    | 4.96 (2.27–9.41)    | 1.50 (0.41–3.84)    |
| Diseases of the genitourinary system (N00–N99)                                              | 39              | 27   | 12     | 14.2            | 8.2   | 6.0    | 2.74 (1.95–3.75)    | 3.29 (2.17–4.78)    | 2.00 (1.03–3.49)    |
| External causes of morbidity and mortality (V01–Y98)                                        | 90              | 70   | 20     | 67.1            | 50.3  | 16.9   | 1.34 (1.08–1.65)    | 1.39 (1.09–1.76)    | 1.19 (0.72–1.83)    |
| Intentional self-harm (X60–X84)                                                             | 43              | 34   | 9      | 26.7            | 20.6  | 6.1    | 1.61 (1.16–2.17)    | 1.65 (1.14–2.30)    | 1.47 (0.67–2.79)    |
| Others (D50–89, H00–H95, L00–L99, O00–O99, P00–P96, Q00–Q99, R00–R99)                       | 262             | 181  | 81     | 149.7           | 87.6  | 62.1   | 1.75 (1.54–1.98)    | 2.07 (1.78–2.39)    | 1.31 (1.04–1.62)    |

CI, confidence interval; SMR, standardized mortality ratio.
