# Supplementary material for: Incidence, Disability, and Mortality in Patients With Guillain-Barré Syndrome in Korea: A Nationwide Population-Based Study
Source: PubMed Central journal article supplement — J Clin Neurol. 2021 Dec 30;18(1):48–58. doi: 10.3988/jcn.2022.18.1.48 (PMC8762496; doi:10.3988/jcn.2022.18.1.48), 2021-12-30
Supplement: jcn-18-48-s005.pdf [file jcn-18-48-s005.pdf]

**Supplementary Table 5.** Detailed causes of death in patients who died from neurological diseases

| Cause of death                                             | ICD-10 code | Values      |
|------------------------------------------------------------|-------------|-------------|
| Inflammatory polyneuropathy                                | G61         | 298 (78.2)  |
| Spinal muscular atrophy and related syndromes              | G12         | 16 (4.2)    |
| Parkinson's disease                                        | G20         | 14 (3.7)    |
| Encephalitis, myelitis, and encephalomyelitis              | G04         | 11 (2.9)    |
| Alzheimer's disease                                        | G30         | 9 (2.4)     |
| Myasthenia gravis and other myoneural disorders            | G70         | 5 (1.3)     |
| Other disorders of the brain                               | G93         | 5 (1.3)     |
| Epilepsy                                                   | G40         | 3 (0.8)     |
| Primary disorders of muscles                               | G71         | 3 (0.8)     |
| Hereditary ataxia                                          | G11         | 2 (0.5)     |
| Multiple sclerosis                                         | G35         | 2 (0.5)     |
| Paraplegia and tetraplegia                                 | G82         | 2 (0.5)     |
| Hydrocephalus                                              | G91         | 2 (0.5)     |
| Other polyneuropathies                                     | G62         | 2 (0.5)     |
| Intracranial and intraspinal abscess and granuloma         | G06         | 1 (0.3)     |
| Other demyelinating diseases of the central nervous system | G37         | 1 (0.3)     |
| Status epilepticus                                         | G41         | 1 (0.3)     |
| Sleep disorders                                            | G47         | 1 (0.3)     |
| Disorders of other cranial nerves                          | G52         | 1 (0.3)     |
| Infantile cerebral palsy                                   | G80         | 1 (0.3)     |
| Other diseases of the spinal cord                          | G95         | 1 (0.3)     |
| Total                                                      |             | 381 (100.0) |

Data are presented as *n* (%) unless otherwise indicated.

ICD-10, International Classification of Diseases, 10th edition.
