# Supplementary material for: Incidence, Disability, and Mortality in Patients With Guillain-Barré Syndrome in Korea: A Nationwide Population-Based Study
Source: PubMed Central journal article supplement — J Clin Neurol. 2021 Dec 30;18(1):48–58. doi: 10.3988/jcn.2022.18.1.48 (PMC8762496; doi:10.3988/jcn.2022.18.1.48), 2021-12-30
Supplement: jcn-18-48-s006.pdf [file jcn-18-48-s006.pdf]

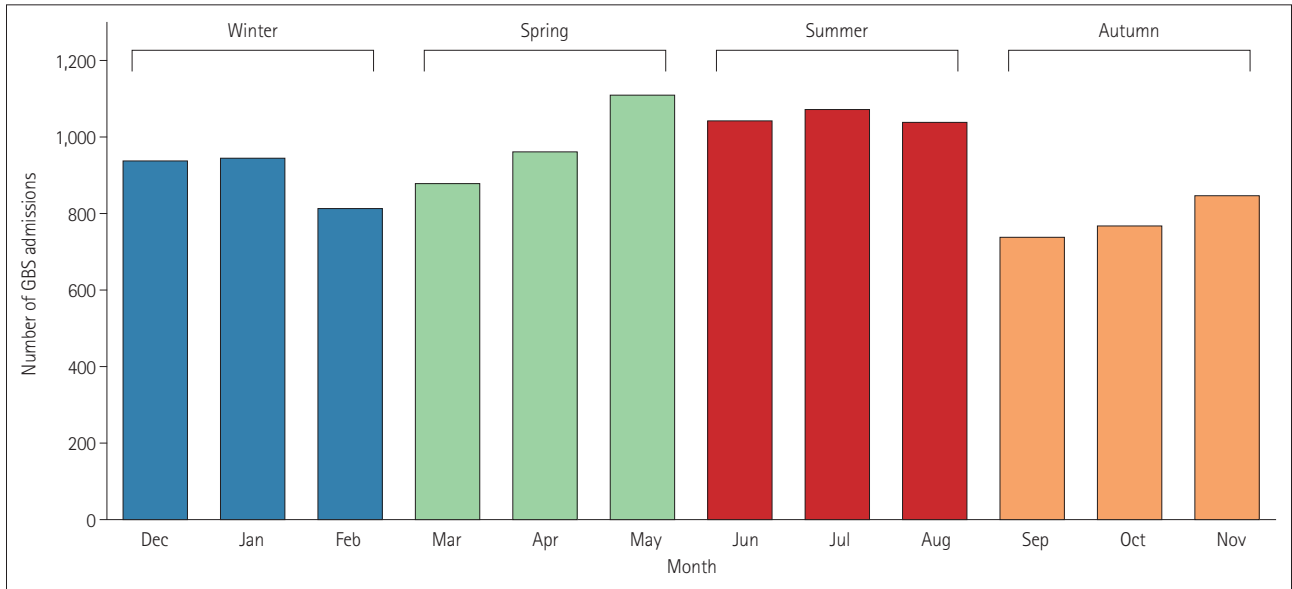

**Supplementary Fig. 1.** Total numbers of GBS admissions in Korea during 2002–2018 by month. GBS, Guillain-Barré syndrome.
